# Supplementary material for: B-Cell Activation Biomarkers in Salivary Glands Are Related to Lymphomagenesis in Primary Sjögren’s Disease: A Pilot Monocentric Exploratory Study
Source: MDPI journal article supplement (doi:10.3390/ijms25063259), 2024-03-13
Supplement: s1 [file s1]

# B-Cell Activation Biomarkers in Salivary Glands Are Related to Lymphomagenesis in Primary Sjögren's Disease: A Pilot Monocentric Exploratory Study

Dario Bruno <sup>1,2</sup>, Barbara Tolusso <sup>3</sup>, Gianmarco Lugli <sup>4</sup>, Clara Di Mario <sup>3</sup>, Luca Petricca <sup>5</sup>, Simone Perniola <sup>1</sup>, Laura Bui <sup>6</sup>, Roberta Benvenuto <sup>6</sup>, Gianfranco Ferraccioli <sup>7</sup>, Stefano Alivernini <sup>3,5,7,\*</sup> and Elisa Gremese <sup>1,3,7,\*</sup>

<sup>1</sup> Clinical Immunology Unit, Fondazione Policlinico Universitario A. Gemelli-IRCCS, 00168 Rome, Italy; dariobrunomd@gmail.com (D.B.); simone.perniola@guest.policlinicogemelli.it (S.P.)

<sup>2</sup> Department of Medicine, University of Verona, 37129 Verona, Italy

<sup>3</sup> Immunology Core Facility, Gemelli Science and Technology Park, Fondazione Policlinico Universitario A. Gemelli-IRCCS, 00168 Rome, Italy; barbara.tolusso@policlinicogemelli.it (B.T.); dimarioclara@gmail.com (C.D.M.)

<sup>4</sup> Rare Disease Unit, Meyer Children's Hospital IRCCS, 50139 Florence, Italy; gianmarco.lugli@meyer.it

<sup>5</sup> Rheumatology Division, Fondazione Policlinico Universitario A. Gemelli-IRCCS, 00168 Rome, Italy; luca.petricca@policlinicogemelli.it

<sup>6</sup> Institute of Pathology, Fondazione Policlinico Universitario A. Gemelli IRCCS, 00168 Rome, Italy; laura.bui@policlinicogemelli.it (L.B.); roberta.benvenuto@policlinicogemelli.it (R.B.)

<sup>7</sup> Department of Internal Medicine, Catholic University of the Sacred Heart, 00168 Rome, Italy; gianfranco.ferraccioli@unicatt.it

\* Correspondence: stefano.alivernini@unicatt.it (S.A.); elisa.gremese@policlinicogemelli.it (E.G.)

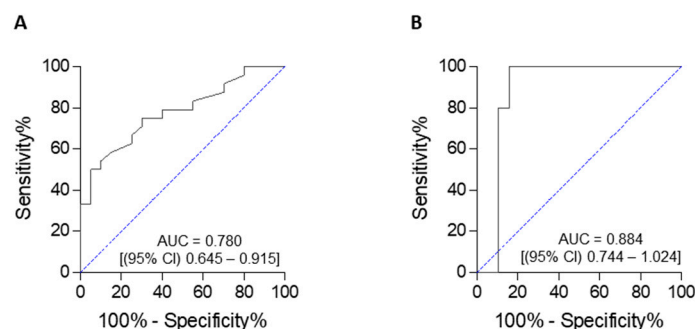

**Supplementary Figure S1. (A,B).** ROC curve analysis showing the power of LSG miR-155 expression (fold-change) in distinguishing patients with sicca syndrome from those with primary Sjögren's disease (pSS) (A) and identifying patients with pSS who developed NHL (B). ROC, receiver operating characteristic curve; LSG, labial salivary glands; miR-155, MicroRNA 155; pSS, primary Sjögren's syndrome; NHL, Non-Hodgkin's lymphoma.
